# Supplementary material for: Extremely large d0 magnetism in krypton implanted polar ZnO films
Source: Royal Society of Chemistry journal article supplement (doi:10.1039/c8tc05929b), 2019-01-01
Supplement: c8tc05929b1.pdf [file c8tc05929b1.pdf]

## Extremely large $d^0$ magnetism in krypton implanted polar ZnO films

### Supplementary Information

We show below that x-ray absorption spectra and transform magnitude for Zn in the implanted films.

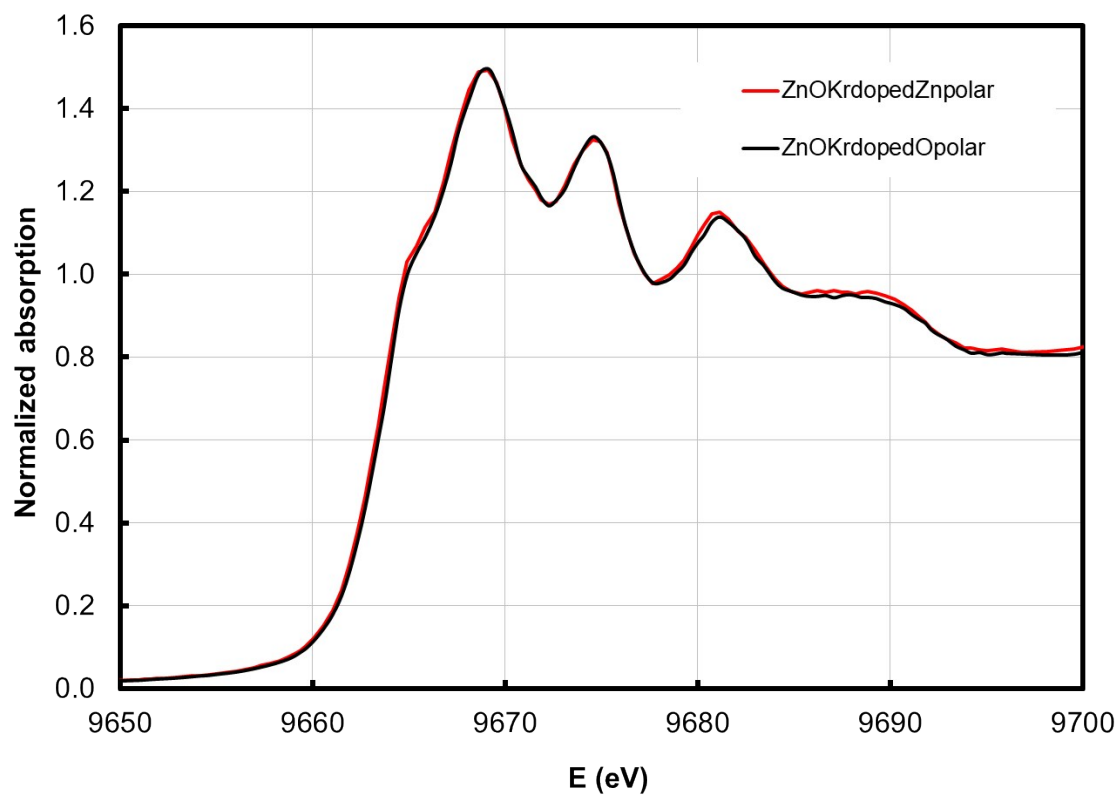

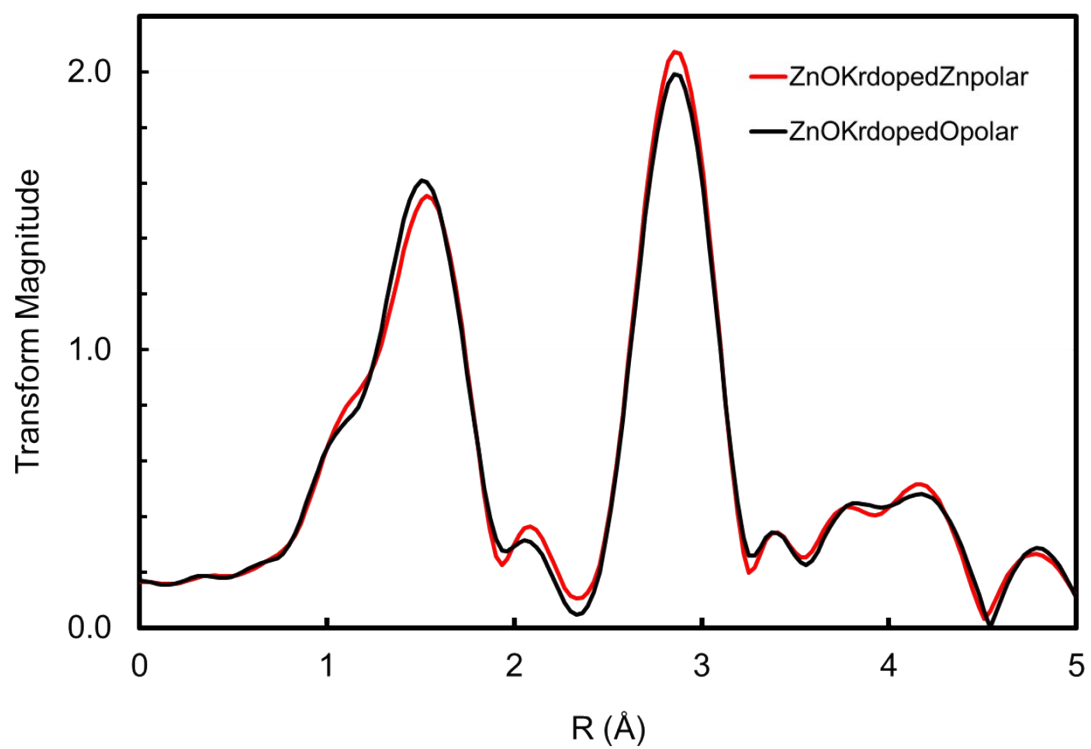

**S1 Fig. 1 X-ray absorption spectra and transform magnitude for Zn in the most heavily implanted polar ZnO films.**
